# Supplementary material for: Efficient Production of Self-Assembled Bioconjugate Nanovaccines against Klebsiella pneumoniae O2 Serotype in Engineered Escherichia coli
Source: MDPI journal article supplement (doi:10.3390/nano14080728), 2024-04-21
Supplement: s1 [file s1]

**Supplementary Table S1** Primers used in this study.

| Primer | Sequence                                  |
|--------|-------------------------------------------|
| G33A-F | CACCGAGAGCCTGGCAGCCAAGCGCGAGAT            |
| G33A-R | GCTGCCAGGCTCTCGGTGTAGCTAAAAATT            |
| G33D-F | AGCTACACCGAGAGCCTGGCAGACAAGCGCGAGATGGCCAT |
| G33D-R | ATGGCCATCTCGCGCTTGTCTGCCAGGCTCTCGGTGTAGCT |
| G33E-F | GCTACACCGAGAGCCTGGCAGAGAAGCGCGAGATGGCCAT  |
| G33E-R | ATGGCCATCTCGCGCTTCTCTGCCAGGCTCTCGGTGTAGC  |
| G33F-F | ACCGAGAGCCTGGCATTCAAGCGCGAGATGGCC         |
| G33F-R | GGCCATCTCGCGCTTGAATGCCAGGCTCTCGGT         |
| G33H-F | AGCTACACCGAGAGCCTGGCACACAAGCGCGAGATGGCCA  |
| G33H-R | TGGCCATCTCGCGCTTGTGTGCCAGGCTCTCGGTGTAGCT  |
| G33I-F | ACACCGAGAGCCTGGCAATCAAGCGCGAGATGGCCATCATC |
| G33I-R | GATGATGGCCATCTCGCGCTTGATTGCCAGGCTCTCGGTGT |
| G33K-F | GCTACACCGAGAGCCTGGCAAAGAAGCGCGAGATGGCCAT  |
| G33K-R | ATGGCCATCTCGCGCTTCTTTGCCAGGCTCTCGGTGTAGC  |
| G33L-F | ACACCGAGAGCCTGGCACTCAAGCGCGAGATGGCCATCAT  |
| G33L-R | ATGATGGCCATCTCGCGCTTGAGTGCCAGGCTCTCGGTGT  |
| G33M-F | GCTACACCGAGAGCCTGGCAATGAAGCGCGAGATGGCCAT  |
| G33M-R | ATGGCCATCTCGCGCTTCATTGCCAGGCTCTCGGTGTAGC  |
| G33N-F | GCTACACCGAGAGCCTGGCAAACAAGCGCGAGATGGCCAT  |
| G33N-R | ATGGCCATCTCGCGCTTGTGTTGCCAGGCTCTCGGTGTAGC |
| G33P-F | GCTACACCGAGAGCCTGGCACCAAAGCGCGAGATGGCCAT  |
| G33P-R | ATGGCCATCTCGCGCTTTGGTGCCAGGCTCTCGGTGTAGC  |
| G33Q-F | CTACACCGAGAGCCTGGCACAAAAGCGCGAGATGGCCATC  |
| G33Q-R | GATGGCCATCTCGCGCTTTTGTGCCAGGCTCTCGGTGTAG  |
| G33R-F | TACACCGAGAGCCTGGCACGCAAGCGCGAG            |
| G33R-R | GTGCCAGGCTCTCGGTGTAGCTAAAAATTT            |
| G33S-F | GCTACACCGAGAGCCTGGCATCAAAGCGCGAGATGGCCAT  |

|        |                                          |
|--------|------------------------------------------|
| G33S-R | ATGGCCATCTCGCGCTTTGATGCCAGGCTCTCGGTGTAGC |
| G33T-F | CTACACCGAGAGCCTGGCAACCAAGCGCGAGATGGCCATC |
| G33T-R | GATGGCCATCTCGCGCTTGGTTGCCAGGCTCTCGGTGTAG |
| G33V-F | ACACCGAGAGCCTGGCAGTCAAGCGCGAGA           |
| G33V-R | ACTGCCAGGCTCTCGGTGTAGCTAAAAATT           |
| G33W-F | GCTACACCGAGAGCCTGGCATGGAAGCGCGAGATGGCCAT |
| G33W-R | ATGGCCATCTCGCGCTTCCATGCCAGGCTCTCGGTGTAGC |
| G33Y-F | GCTACACCGAGAGCCTGGCATACAAGCGCGAGATGGCCAT |
| G33Y-R | ATGGCCATCTCGCGCTTGTATGCCAGGCTCTCGGTGTAGC |

---
